# Supplementary material for: First-In-Class CD13-Targeted Tissue Factor tTF-NGR in Patients with Recurrent or Refractory Malignant Tumors: Results of a Phase I Dose-Escalation Study
Source: Cancers (Basel). 2020 Jun 7;12(6):1488. doi: 10.3390/cancers12061488 (PMC7352358; doi:10.3390/cancers12061488)
Supplement: Supplementary file 1 [file cancers-12-01488-s001.zip › cancers-841723_supplementary_for_XMLberdel corr.pdf]

*Supplementary Material*

# **First-in-Class CD13-Targeted Tissue Factor tTF-NGR in Patients with Recurrent or Refractory Malignant Tumors Beyond Standard Treatment: Results of a Phase I Dose-Escalation Study**

Christoph Schliemann <sup>1</sup>, Mirjam Gerwing, Hauke Heinzow, Saliha Harrach, Christian Schwöppe, Moritz Wildgruber, Anna A. Hansmeier, Linus Angenendt, Andrew F. Berdel, Ursula Stalman, Björna Berning, Karsten Kratz-Albers, Kristina Middelberg-Bisping, Stefanie Wiebe, Jörn Albring, Christian Wilms, Wolfgang Hartmann, Eva Wardelmann, Tobias Krähling, Walter Heindel, Joachim Gerss, Eike Bormann, Hartmut Schmidt, Georg Lenz, Torsten Kessler, Rolf M. Mesters, Wolfgang E. Berdel <sup>1</sup>

<sup>1</sup> Department of Medicine A (Hematology and Oncology), University Hospital Muenster, Albert Schweitzer Campus 1, D-48149 Muenster, Germany; email: Christoph.Schliemann@ukmuenster.de, berdel@uni-muenster.de

## **CONTENT**

|                       |      |
|-----------------------|------|
| Supplementary Figures | p. 2 |
| Supplementary Tables  | p. 9 |

## Supplementary Figures

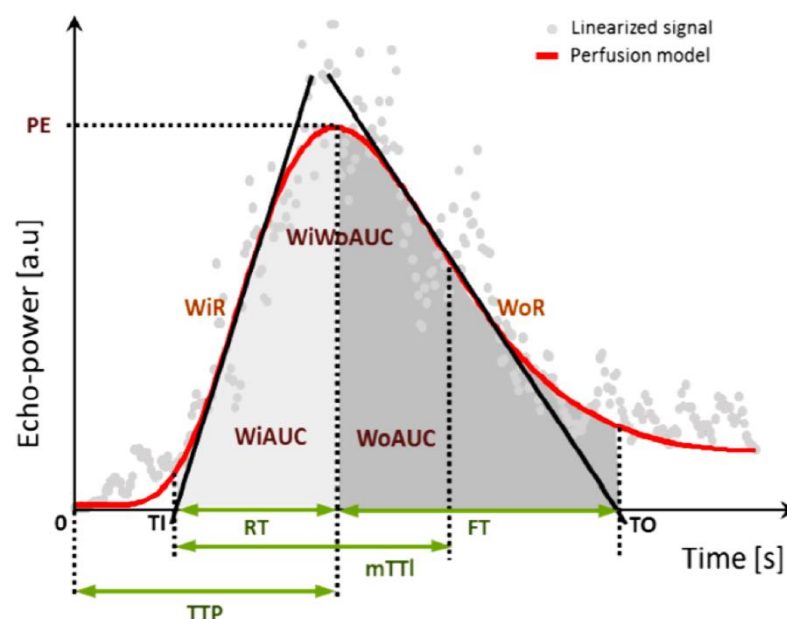

| Abbreviations | Time-intensity curve parameters on CEUS                                                                              | Units  |
|---------------|----------------------------------------------------------------------------------------------------------------------|--------|
| PE            | Peak-Enhancement                                                                                                     | [a.u.] |
| WiAUC         | Wash-in Area Under the Curve (AUC (TI:TTP))                                                                          | [a.u.] |
| RT            | Rise Time – Anstiegszeit (TTP – TI)                                                                                  | [s]    |
| mTTI          | Mean Transit Time local – mittlere Durchgangszeit (local) (mTT – TI)                                                 | [s]    |
| TTP           | Time to Peak                                                                                                         | [s]    |
| TO            | Tangent Out (maximum slope intersection with x-axis)                                                                 | [s]    |
| WiR           | Wash-in-Rate (maximaler Anstieg)                                                                                     | [a.u.] |
| WIPI          | Wash-in Perfusion Index – Wash-inPerfusionsindex (WiAUC / RT)                                                        | [a.u.] |
| WoAUC         | Wash-out AUC (AUC (TTP:TO))                                                                                          | [a.u.] |
| WiWoAUC       | Wash-in- and Wash-out-AUC (WiAUC + WoAUC)                                                                            | [a.u.] |
| FT            | Fall Time – Abstiegszeit (TO-TTP)                                                                                    | [s]    |
| WoR           | Wash-out-Rate (geringster Anstieg)                                                                                   | [a.u.] |
| QOF           | Quality Of Fit between the echo-power signal and f(t) - Passungsqualität zwischen dem Echointensitätssignal und f(t) | [%]    |

**Figure S1. Dynamic contrast-enhanced ultrasound (CEUS).** Schematic drawing of time-intensity curve parameters of a perfusion model in contrast-enhanced ultrasound (CEUS) imaging. The figure was modified with consent from the manufacturer Bracco Imaging Deutschland GmbH, the property and the copy right remains with Bracco.

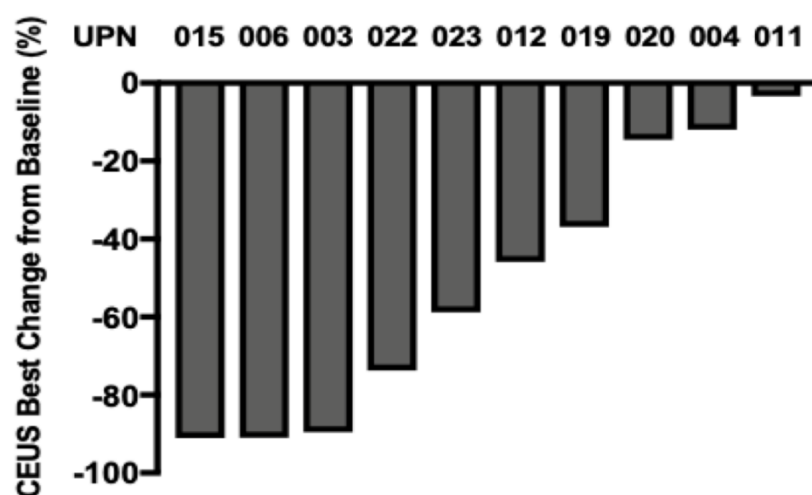

**Figure S2.** CEUS blood flow decrease in all patients with measurable lesions. Waterfall plots of UPNs with completed cycle 1 show best change from baseline of tumor perfusion within cycle 1 per patient.

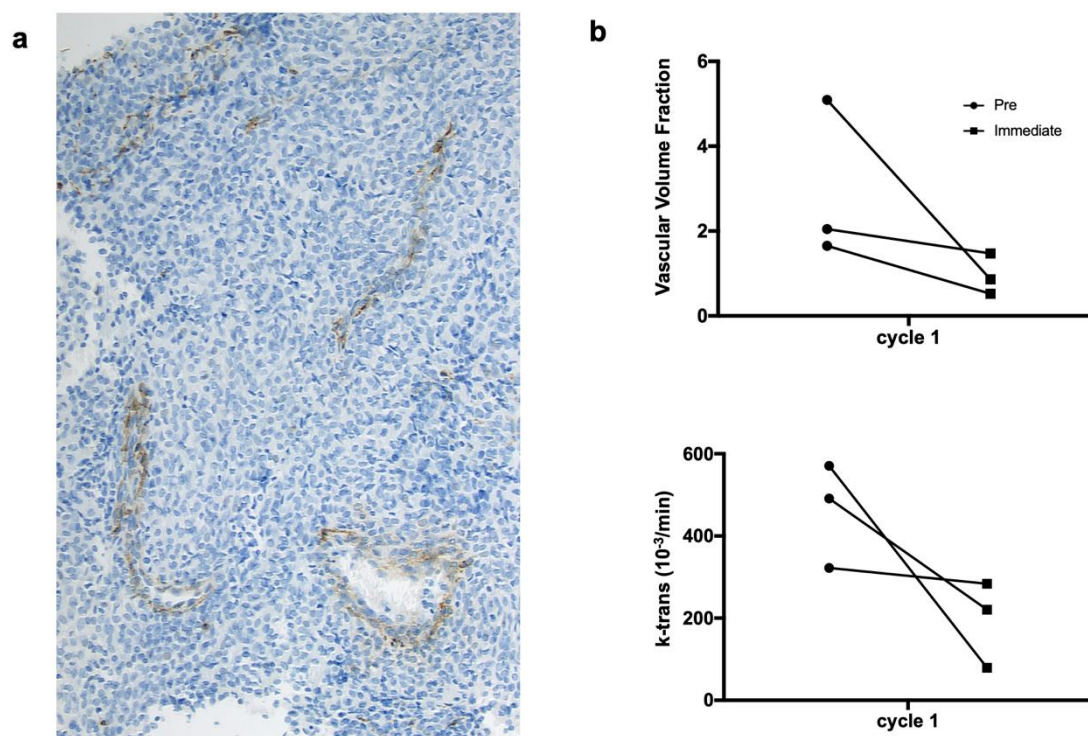

**Figure S3. Reduction of tumor perfusion by tTF-NGR in a synovial sarcoma with CD13 positivity in the tumor vasculature only.** (a) Immunohistochemistry of a synovial sarcoma (UPN 008) showing CD13 negativity of the tumor cells, but CD13 positivity (brownish stain, intensity score 2; ref. Kessler et al., manuscript text ref. 20) in the tumor vasculature. (b) Tumor blood flow in 3 different lesions of liver metastasis in the same patient as measured by MRI depicting k-trans and VVF before tTF-NGR application (Pre) and 5 hours after (Immediate) the 1st application of tTF-NGR.

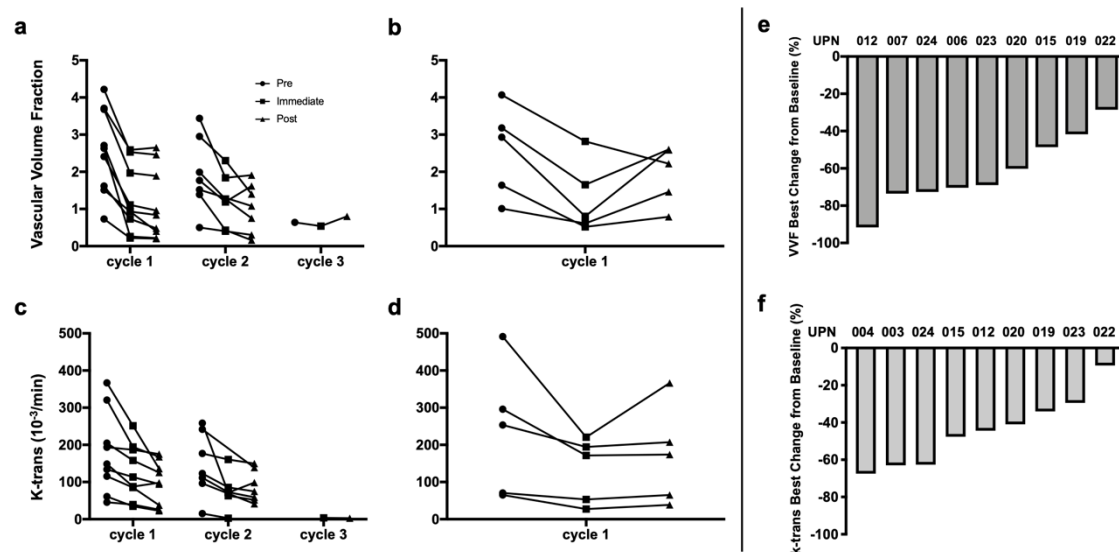

**Figure S4. Changes in tumor perfusion during treatment with tTF-NGR in all patients serially imaged.** Changes of MRI perfusion parameters before (Pre), during (Immediate, after 5 hours) and after treatment (Post, after 5 days at the end of a cycle) of completed cycles are shown in the left panels for Vascular Volume Fraction VVF (a; UPN 007, 012, 015, 019, 020, 022, 023, 024) and K-trans (c; UPN 003, 004, 012, 015, 019, 020, 022, 023, 024). VVF (a, b; arbitrary units in the y-axis) and k-trans (c, d; in  $10^{-3}/\text{min}$ ) both show a decrease in perfusion after treatment with tTF-NGR in all patients. Incomplete cycles due to a rise in Troponin T hs (DLT) are shown in the right panels for VVF (b; UPN 008, 009, 011, 018, 021) and K-trans (d; UPN 008, 009, 011, 018, 021). Notice that immediate decrease of tumor perfusion (5-hour values, black squares) in all patients (b, d) was blocked and/or reversed (Post) by stop of tTF-NGR application and initiation of anticoagulation further demonstrating the mode of action of tTF-NGR. Waterfall plots of UPNs with completed cycle 1 (e; VVF and f; k-trans) show best change from baseline of tumor perfusion within cycle 1 per patient.

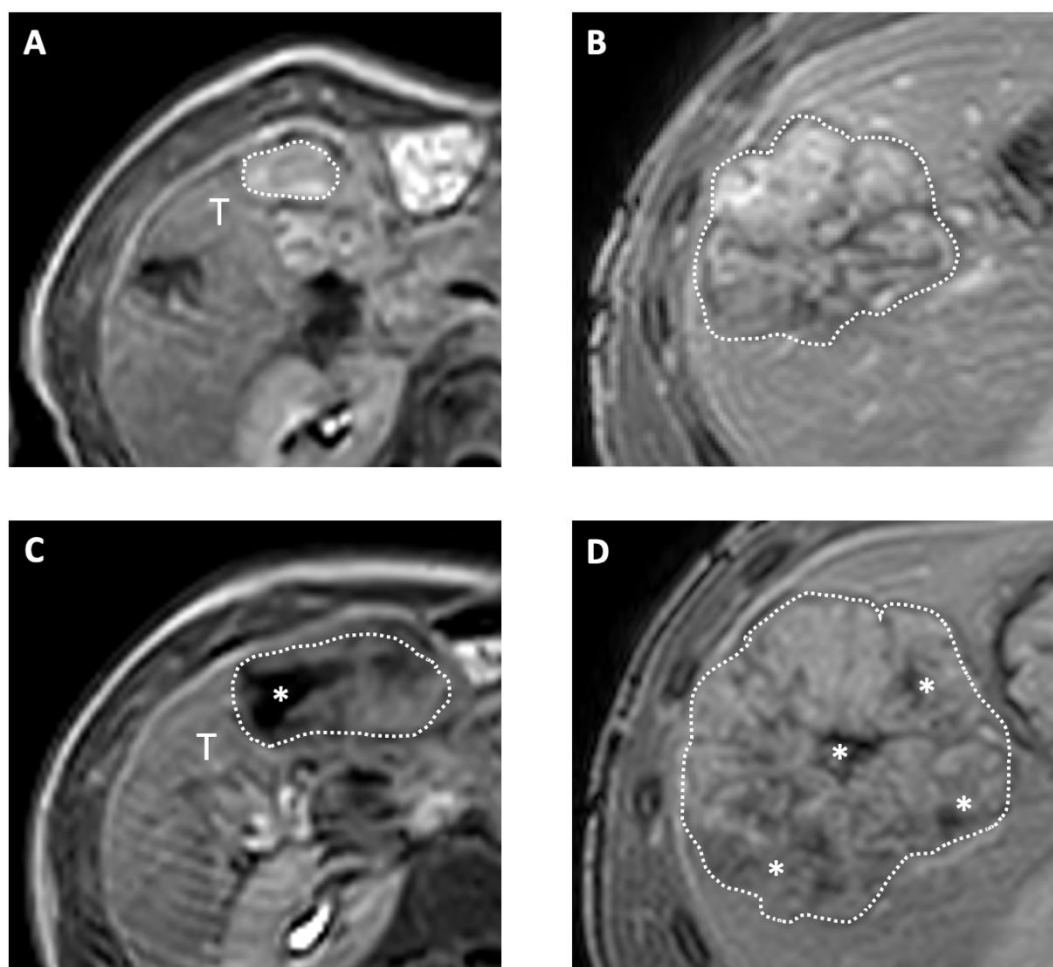

**Figure S5. Intratumoral necrosis in liver metastases of a germ cell tumor (UPN 003).** A/B: Before treatment with tTF-NGR at  $1.5 \text{ mg/m}^2 \times 5$ , the tumor (dotted line) shows a more homogenous contrast enhancement in T1 weighted MRI. C/D: After two cycles of tTF-NGR, hypointense areas without contrast enhancement (\*) are visible under progressive disease.

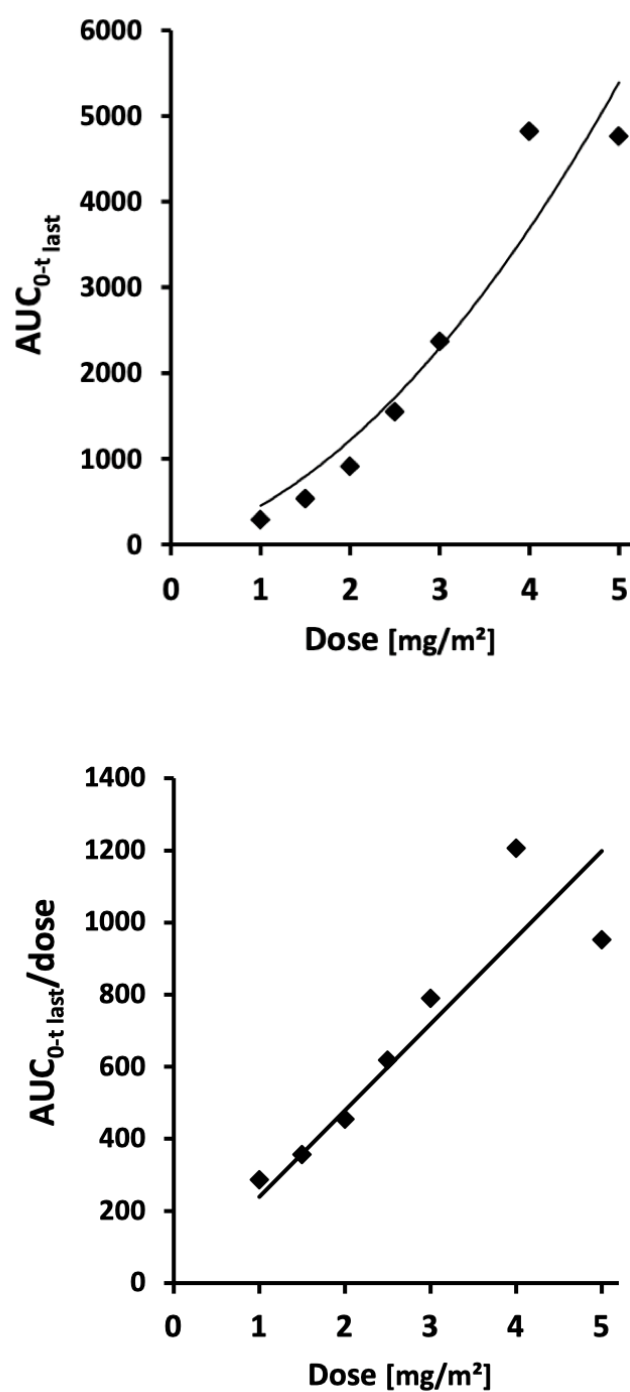

**Figure S6. Visualization of the dose proportionality factor (DPF).** Two different calculations are shown. Values at 5 mg/m<sup>2</sup> tTF-NGR have to be interpreted with caution since this dose level was complicated by difficulties to draw and prepare blood samples for testing due to sticky consistency.

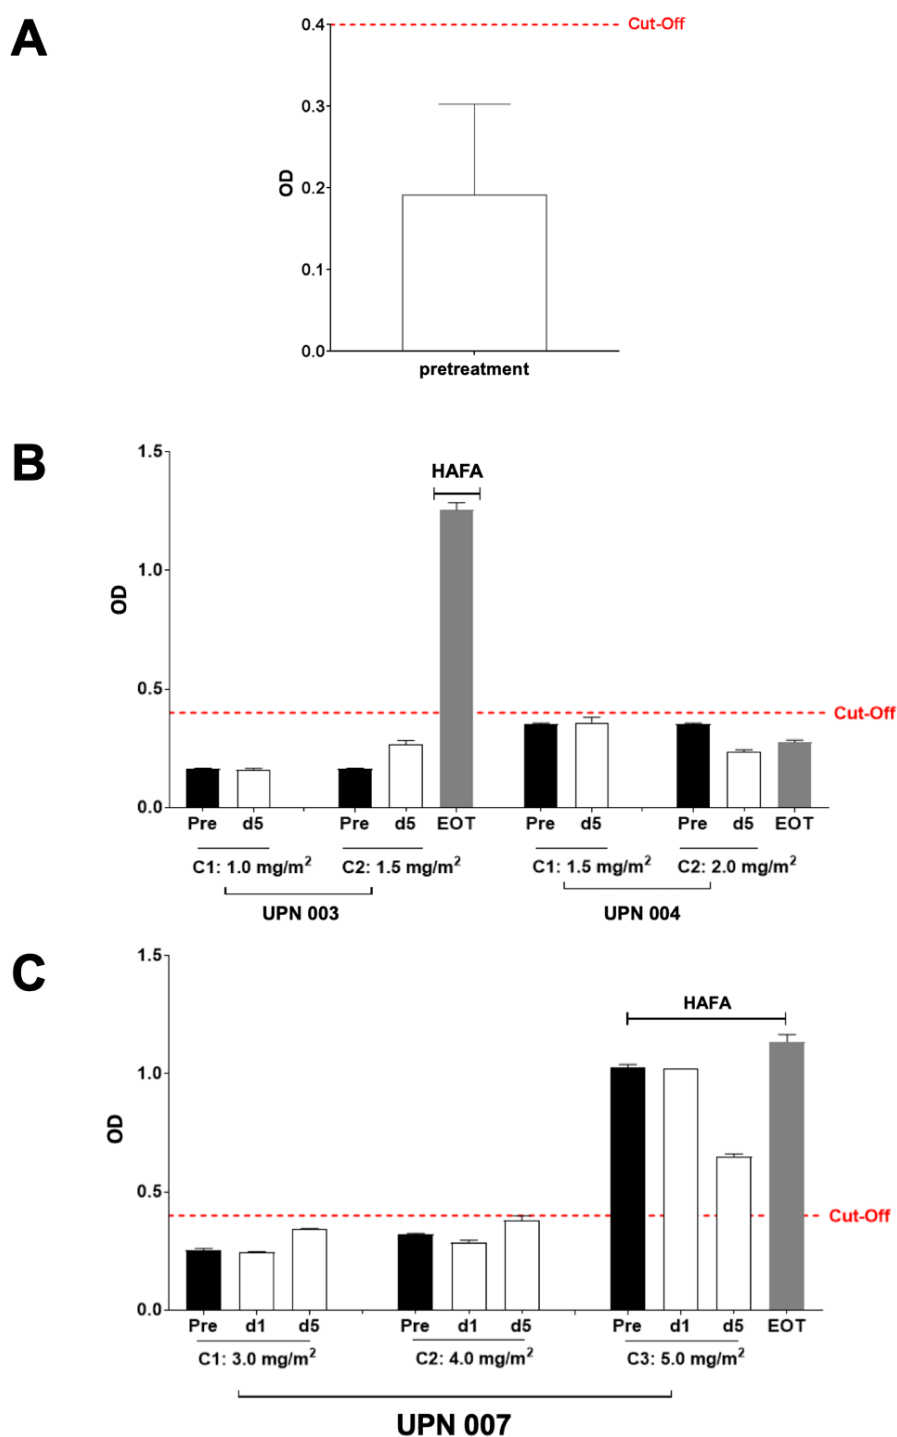

**Figure S7. Detection of human anti-fusion protein (tTF-NGR) IgG antibodies (HAFA) in the patient's plasma.** (A) Establishment of the cut-off value on the basis of all pretreatment values (mean  $\pm$  standard deviation). (B) Patient UPN 004 shows values typical for the 15 patients without HAFA formation. Patient UPN 007 showed clearly detectable but low HAFA titers in the 3<sup>rd</sup> cycle of therapy. OD, optical density; C, cycle; d, day; Pre, before treatment; EOT, end of treatment (for details see Methods).

## Supplementary Tables

Table S1. AE listing.

Page 1 of 8

tTF-NGR Phase I Study EudraCT-No.: 2016-003042-85

Line listing of adverse events (AEs) as reported in eCRF at 16.12.2019

| Patient ID | AE No. | MedDRA preferred term (v22.1)                   | Date of onset of AE | Date of end of AE | or ongoing | CTCAE Grading (v 4.0) | serious (=SAE) | Relationship to tTF-NGR   | Action taken with tTF-NGR | Comment on action taken with tTF-NGR | AE considered as DLT by investigator | AE that caused discontinuation of whole study | Outcome                     |
|------------|--------|-------------------------------------------------|---------------------|-------------------|------------|-----------------------|----------------|---------------------------|---------------------------|--------------------------------------|--------------------------------------|-----------------------------------------------|-----------------------------|
| 057-003    | 1      | Cough                                           | 01/06/2017          | 09/06/2017        | .          | Grade 1 (mild)        | No             | No reasonable possibility | Dose not changed          |                                      | No                                   | No                                            | Recovered/ Resolved         |
| 057-003    | 2      | Fatigue                                         | 03/06/2017          | 04/06/2017        | .          | Grade 1 (mild)        | No             | No reasonable possibility | Dose not changed          |                                      | No                                   | No                                            | Recovered/ Resolved         |
| 057-003    | 3      | Aspartate aminotransferase increased            | 08/05/2017          | 08/05/2017        | .          | Grade 1 (mild)        | No             | No reasonable possibility | Dose not changed          |                                      | No                                   | No                                            | Recovered/ Resolved         |
| 057-003    | 4      | Aspartate aminotransferase increased            | 24/05/2017          | 05/07/2017        | .          | Grade 1 (mild)        | No             | No reasonable possibility | Dose not changed          |                                      | No                                   | No                                            | Recovered/ Resolved         |
| 057-003    | 5      | Alanine aminotransferase increased              | 24/05/2017          | 24/05/2017        | .          | Grade 1 (mild)        | No             | No reasonable possibility | Dose not changed          |                                      | No                                   | No                                            | Recovered/ Resolved         |
| 057-003    | 6      | Alanine aminotransferase increased              | 29/05/2017          | 05/07/2017        | .          | Grade 1 (mild)        | No             | No reasonable possibility | Dose not changed          |                                      | No                                   | No                                            | Recovered/ Resolved         |
| 057-003    | 7      | Blood alkaline phosphatase increased            | 24/05/2017          | 10/12/2017        | .          | Grade 1 (mild)        | No             | No reasonable possibility | Dose not changed          |                                      | No                                   | No                                            | Not recovered/ Not resolved |
| 057-003    | 8      | Blood lactate dehydrogenase increased           | 24/05/2017          | 10/12/2017        | .          | Grade 2 (moderate)    | No             | No reasonable possibility | Dose not changed          |                                      | No                                   | No                                            | Not recovered/ Not resolved |
| 057-003    | 9      | Thrombocytopenia                                | 08/05/2017          | 09/05/2017        | .          | Grade 1 (mild)        | No             | No reasonable possibility | Dose not changed          |                                      | No                                   | No                                            | Recovered/ Resolved         |
| 057-003    | 10     | International normalised ratio increased        | 08/05/2017          | 08/05/2017        | .          | Grade 1 (mild)        | No             | No reasonable possibility | Dose not changed          |                                      | No                                   | No                                            | Recovered/ Resolved         |
| 057-003    | 11     | International normalised ratio increased        | 05/05/2017          | 05/07/2017        | .          | Grade 1 (mild)        | No             | No reasonable possibility | Dose not changed          |                                      | No                                   | No                                            | Recovered/ Resolved         |
| 057-003    | 12     | Activated partial thromboplastin time prolonged | 08/05/2017          | 08/05/2017        | .          | Grade 1 (mild)        | No             | No reasonable possibility | Dose not changed          |                                      | No                                   | No                                            | Recovered/ Resolved         |
| 057-003    | 13     | Alpha 1 foetoprotein increased                  | 29/05/2017          | 10/12/2017        | .          | Grade 3 (severe)      | No             | No reasonable possibility | Dose not changed          |                                      | No                                   | No                                            | Not recovered/ Not resolved |

ZKS Münster

SAS-program: tTF\_NGR\_AE\_Listing\_V1.3.sas

Date of export: 16.12.2019

## tTF-NGR Phase I Study EudraCT-No.: 2016-003042-85

Page 2 of 8

## Line listing of adverse events (AEs) as reported in eCRF at 16.12.2019

| Patient ID | AE No. | MedDRA preferred term (v22.1)         | Date of onset of AE | Date of end of AE | or ongoing | CTCAE Grading (v 4.0)                | serious (=SAE) | Relationship to tTF-NGR   | Action taken with tTF-NGR | Comment on action taken with tTF-NGR | AE considered as DLT by investigator | AE that caused discontinuation of whole study | Outcome                     |
|------------|--------|---------------------------------------|---------------------|-------------------|------------|--------------------------------------|----------------|---------------------------|---------------------------|--------------------------------------|--------------------------------------|-----------------------------------------------|-----------------------------|
| 057-003    | 14     | Blood cholinesterase decreased        | 01/06/2017          | 01/06/2017        | .          | Grade 1 (mild)                       | No             | No reasonable possibility | Dose not changed          |                                      | No                                   | No                                            | Recovered/ Resolved         |
| 057-003    | 15     | Plasmin inhibitor decreased           | 08/05/2017          | 08/05/2017        | .          | Grade 1 (mild)                       | No             | Reasonable possibility    | Dose not changed          |                                      | No                                   | No                                            | Recovered/ Resolved         |
| 057-003    | 16     | Fibrin D dimer increased              | 08/05/2017          | 08/05/2017        | .          | Grade 1 (mild)                       | No             | Reasonable possibility    | Dose not changed          |                                      | No                                   | No                                            | Recovered/ Resolved         |
| 057-003    | 17     | Antithrombin III decreased            | 08/05/2017          | 08/05/2017        | .          | Grade 1 (mild)                       | No             | Reasonable possibility    | Dose not changed          |                                      | No                                   | No                                            | Recovered/ Resolved         |
| 057-004    | 1      | Nausea                                | 14/06/2017          | 15/06/2017        | .          | Grade 1 (mild)                       | No             | No reasonable possibility | Dose not changed          |                                      | No                                   | No                                            | Recovered/ Resolved         |
| 057-004    | 2      | Headache                              | 15/06/2017          | 15/06/2017        | .          | Grade 1 (mild)                       | No             | No reasonable possibility | Dose not changed          |                                      | No                                   | No                                            | Recovered/ Resolved         |
| 057-004    | 3      | Pruritus                              | 15/06/2017          | 16/06/2017        | .          | Grade 1 (mild)                       | No             | No reasonable possibility | Dose not changed          |                                      | No                                   | No                                            | Recovered/ Resolved         |
| 057-004    | 4      | Blood bilirubin increased             | 20/06/2017          | 24/06/2017        | .          | Grade 4 (lifethreatening/ disabling) | No             | No reasonable possibility | Dose not changed          |                                      | No                                   | No                                            | Recovered/ Resolved         |
| 057-004    | 5      | Pruritus                              | 27/06/2017          | 31/07/2017        | .          | Grade 1 (mild)                       | No             | No reasonable possibility | Dose not changed          |                                      | No                                   | No                                            | Not recovered/ Not resolved |
| 057-004    | 6      | Hypokalaemia                          | 03/07/2017          | 04/07/2017        | .          | Grade 1 (mild)                       | No             | No reasonable possibility | Dose not changed          |                                      | No                                   | No                                            | Recovered/ Resolved         |
| 057-004    | 7      | Anaemia                               | 05/07/2017          | 06/07/2017        | .          | Grade 3 (severe)                     | No             | No reasonable possibility | Dose not changed          |                                      | No                                   | No                                            | Recovered/ Resolved         |
| 057-004    | 8      | Supraventricular tachycardia          | 04/07/2017          | 04/07/2017        | .          | Grade 3 (severe)                     | No             | No reasonable possibility | Dose not changed          |                                      | No                                   | No                                            | Recovered/ Resolved         |
| 057-004    | 9      | General physical health deterioration | 03/07/2017          | 31/07/2017        | .          | Grade 3 (severe)                     | No             | No reasonable possibility | Dose not changed          |                                      | No                                   | No                                            | Not recovered/ Not resolved |
| 057-004    | 10     | Nausea                                | 03/07/2017          | 05/07/2017        | .          | Grade 1 (mild)                       | No             | No reasonable possibility | Dose not changed          |                                      | No                                   | No                                            | Recovered/ Resolved         |

## tTF-NGR Phase I Study EudraCT-No.: 2016-003042-85

## Line listing of adverse events (AEs) as reported in eCRF at 16.12.2019

| Patient ID | AE No. | MedDRA preferred term (v22.1)                 | Date of onset of AE | Date of end of AE | or ongoing | CTCAE Grading (v 4.0) | serious (=SAE) | Relationship to tTF-NGR   | Action taken with tTF-NGR | Comment on action taken with tTF-NGR | AE considered as DLT by investigator | AE that caused discontinuation of whole study | Outcome                     |
|------------|--------|-----------------------------------------------|---------------------|-------------------|------------|-----------------------|----------------|---------------------------|---------------------------|--------------------------------------|--------------------------------------|-----------------------------------------------|-----------------------------|
| 057-004    | 11     | Nausea                                        | 23/07/2017          | 23/07/2017        | .          | Grade 1 (mild)        | No             | No reasonable possibility | Dose not changed          |                                      | No                                   | No                                            | Recovered/ Resolved         |
| 057-005    | 1      | Constipation                                  | 24/07/2017          | 25/07/2017        | .          | Grade 1 (mild)        | No             | No reasonable possibility | Dose not changed          |                                      | No                                   | No                                            | Recovered/ Resolved         |
| 057-005    | 2      | Pain in extremity                             | 24/07/2017          | 25/07/2017        | .          | Grade 2 (moderate)    | No             | No reasonable possibility | Dose not changed          |                                      | No                                   | No                                            | Recovered/ Resolved         |
| 057-005    | 3      | Cough                                         | 25/07/2017          | 30/08/2017        | .          | Grade 2 (moderate)    | No             | No reasonable possibility | Dose not changed          |                                      | No                                   | No                                            | Recovered/ Resolved         |
| 057-005    | 4      | Bacterial infection; Device related infection | 25/07/2017          | 26/07/2017        | .          | Grade 2 (moderate)    | No             | No reasonable possibility | Dose not changed          |                                      | No                                   | No                                            | Recovered/ Resolved         |
| 057-005    | 5      | Back pain                                     | 25/07/2017          | .                 | Ongoing    | Grade 2 (moderate)    | No             | No reasonable possibility | Dose not changed          |                                      | No                                   | No                                            | Recovering/ Resolving       |
| 057-005    | 6      | Anaemia                                       | 25/07/2017          | 25/07/2017        | .          | Grade 3 (severe)      | No             | No reasonable possibility | Dose not changed          |                                      | No                                   | No                                            | Recovered/ Resolved         |
| 057-005    | 7      | Haemoptysis                                   | 04/08/2017          | 05/08/2017        | .          | Grade 3 (severe)      | No             | No reasonable possibility | Dose not changed          |                                      | No                                   | No                                            | Recovered/ Resolved         |
| 057-005    | 8      | Haemoptysis                                   | 15/08/2017          | 16/08/2017        | .          | Grade 2 (moderate)    | No             | No reasonable possibility | Dose not changed          |                                      | No                                   | No                                            | Recovered/ Resolved         |
| 057-005    | 9      | Nausea                                        | 14/08/2017          | 18/08/2017        | .          | Grade 1 (mild)        | No             | Reasonable possibility    | Dose not changed          |                                      | No                                   | No                                            | Recovered/ Resolved         |
| 057-005    | 10     | Vertigo                                       | 15/08/2017          | 16/08/2017        | .          | Grade 1 (mild)        | No             | Reasonable possibility    | Dose not changed          |                                      | No                                   | No                                            | Recovered/ Resolved         |
| 057-005    | 11     | Headache                                      | 15/08/2017          | 18/08/2017        | .          | Grade 1 (mild)        | No             | Reasonable possibility    | Dose not changed          |                                      | No                                   | No                                            | Recovered/ Resolved         |
| 057-005    | 12     | Troponin T increased                          | 16/08/2017          | 30/08/2017        | .          | Grade 1 (mild)        | No             | Reasonable possibility    | Dose not changed          |                                      | No                                   | No                                            | Recovered/ Resolved         |
| 057-005    | 13     | Pyrexia                                       | 18/08/2017          | 18/08/2017        | .          | Grade 1 (mild)        | Yes            | No reasonable possibility | Dose not changed          |                                      | No                                   | No                                            | Recovered/ Resolved         |
| 057-006    | 1      | Abdominal pain                                | 04/09/2017          | 15/09/2017        | .          | Grade 1 (mild)        | No             | Reasonable possibility    | Dose not changed          |                                      | No                                   | No                                            | Not recovered/ Not resolved |

## tTF-NGR Phase I Study EudraCT-No.: 2016-003042-85

## Line listing of adverse events (AEs) as reported in eCRF at 16.12.2019

| Patient ID | AE No. | MedDRA preferred term (v22.1)                     | Date of onset of AE | Date of end of AE | or ongoing | CTCAE Grading (v 4.0) | serious (=SAE) | Relationship to tTF-NGR   | Action taken with tTF-NGR | Comment on action taken with tTF-NGR | AE considered as DLT by investigator | AE that caused discontinuation of whole study | Outcome                     |
|------------|--------|---------------------------------------------------|---------------------|-------------------|------------|-----------------------|----------------|---------------------------|---------------------------|--------------------------------------|--------------------------------------|-----------------------------------------------|-----------------------------|
| 057-006    | 2      | Abdominal pain                                    | 15/09/2017          | 29/09/2017        | .          | Grade 3 (severe)      | Yes            | No reasonable possibility | Dose not changed          |                                      | No                                   | No                                            | Not recovered/ Not resolved |
| 057-006    | 3      | Back pain;<br>Musculoskeletal pain;<br>Arthralgia | 04/09/2017          | 14/09/2017        | .          | Grade 2 (moderate)    | No             | No reasonable possibility | Dose not changed          |                                      | No                                   | No                                            | Recovered/ Resolved         |
| 057-006    | 4      | Decreased appetite                                | 16/09/2017          | 18/09/2017        | .          | Grade 1 (mild)        | No             | No reasonable possibility | Dose not changed          |                                      | No                                   | No                                            | Recovered/ Resolved         |
| 057-006    | 5      | Nausea                                            | 16/09/2017          | 18/09/2017        | .          | Grade 2 (moderate)    | No             | No reasonable possibility | Dose not changed          |                                      | No                                   | No                                            | Recovered/ Resolved         |
| 057-006    | 6      | Urinary tract infection                           | 07/09/2017          | 08/09/2017        | .          | Grade 2 (moderate)    | No             | No reasonable possibility | Dose not changed          |                                      | No                                   | No                                            | Recovered/ Resolved         |
| 057-006    | 7      | Pleural effusion                                  | 11/10/2017          | 18/10/2017        | .          | Grade 3 (severe)      | No             | No reasonable possibility | Not applicable            |                                      | No                                   | No                                            | Recovered/ Resolved         |
| 057-006    | 8      | Oedema peripheral                                 | 21/10/2017          | 23/10/2017        | .          | Grade 2 (moderate)    | No             | No reasonable possibility | Not applicable            |                                      | No                                   | No                                            | Recovered/ Resolved         |
| 057-007    | 1      | Nausea                                            | 04/12/2017          | 22/01/2018        | .          | Grade 2 (moderate)    | No             | No reasonable possibility | Dose not changed          |                                      | No                                   | No                                            | Recovered/ Resolved         |
| 057-007    | 2      | Pyrexia                                           | 28/12/2017          | 29/12/2017        | .          | Grade 1 (mild)        | No             | Reasonable possibility    | Dose not changed          |                                      | No                                   | No                                            | Recovered/ Resolved         |
| 057-007    | 3      | Pyrexia                                           | 15/01/2018          | 15/01/2018        | .          | Grade 1 (mild)        | No             | Reasonable possibility    | Dose not changed          |                                      | No                                   | No                                            | Recovered/ Resolved         |
| 057-007    | 4      | Vomiting                                          | 27/12/2017          | 27/12/2017        | .          | Grade 1 (mild)        | No             | No reasonable possibility | Dose not changed          |                                      | No                                   | No                                            | Recovered/ Resolved         |
| 057-007    | 5      | Bone pain                                         | 27/12/2017          | 27/12/2017        | .          | Grade 1 (mild)        | No             | No reasonable possibility | Dose not changed          |                                      | No                                   | No                                            | Recovered/ Resolved         |
| 057-007    | 6      | Vertigo                                           | 30/12/2017          | 30/12/2017        | .          | Grade 1 (mild)        | No             | No reasonable possibility | Dose not changed          |                                      | No                                   | No                                            | Recovered/ Resolved         |
| 057-007    | 7      | Cough                                             | 26/12/2017          | 26/12/2017        | .          | Grade 1 (mild)        | No             | No reasonable possibility | Dose not changed          |                                      | No                                   | No                                            | Recovered/ Resolved         |
| 057-007    | 8      | Haematuria                                        | 06/12/2017          | 07/12/2017        | .          | Grade 1 (mild)        | No             | No reasonable possibility | Dose not changed          |                                      | No                                   | No                                            | Recovered/ Resolved         |

## tTF-NGR Phase I Study EudraCT-No.: 2016-003042-85

## Line listing of adverse events (AEs) as reported in eCRF at 16.12.2019

| Patient ID | AE No. | MedDRA preferred term (v22.1) | Date of onset of AE | Date of end of AE | or ongoing | CTCAE Grading (v 4.0) | serious (=SAE) | Relationship to tTF-NGR   | Action taken with tTF-NGR  | Comment on action taken with tTF-NGR      | AE considered as DLT by investigator | AE that caused discontinuation of whole study | Outcome                     |
|------------|--------|-------------------------------|---------------------|-------------------|------------|-----------------------|----------------|---------------------------|----------------------------|-------------------------------------------|--------------------------------------|-----------------------------------------------|-----------------------------|
| 057-007    | 9      | Headache                      | 06/12/2017          | 07/12/2017        | .          | Grade 1 (mild)        | No             | No reasonable possibility | Dose not changed           |                                           | No                                   | No                                            | Recovered/ Resolved         |
| 057-007    | 10     | Chest pain                    | 01/12/2017          | 05/12/2017        | .          | Grade 1 (mild)        | No             | No reasonable possibility | Not applicable             |                                           | No                                   | No                                            | Recovered/ Resolved         |
| 057-008    | 1      | Headache                      | 19/02/2018          | 20/02/2018        | .          | Grade 1 (mild)        | No             | No reasonable possibility | Dose not changed           |                                           | No                                   | No                                            | Recovered/ Resolved         |
| 057-008    | 2      | Pain in extremity             | 20/02/2018          | 20/02/2018        | .          | Grade 1 (mild)        | No             | Reasonable possibility    | Dose not changed           |                                           | No                                   | No                                            | Recovered/ Resolved         |
| 057-008    | 3      | Deep vein thrombosis          | 20/02/2018          | 22/02/2018        | .          | Grade 2 (moderate)    | Yes            | Reasonable possibility    | Drug permanently withdrawn | study Medication stopped for this patient | No                                   | No                                            | Recovered/ Resolved         |
| 057-008    | 4      | Troponin T increased          | 21/02/2018          | 02/03/2018        | .          | Grade 3 (severe)      | Yes            | Reasonable possibility    | Drug permanently withdrawn | study Medication stopped for this patient | Yes                                  | No                                            | Recovered/ Resolved         |
| 057-008    | 5      | Nasopharyngitis               | 20/03/2018          | 21/03/2018        | .          | Grade 1 (mild)        | No             | No reasonable possibility | Not applicable             |                                           | No                                   | No                                            | Recovered/ Resolved         |
| 057-009    | 1      | Hypokalaemia                  | 05/03/2018          | 05/03/2018        | .          | Grade 1 (mild)        | No             | Reasonable possibility    | Dose not changed           |                                           | No                                   | No                                            | Recovered/ Resolved         |
| 057-009    | 2      | Troponin T increased          | 05/03/2018          | 21/03/2018        | .          | Grade 3 (severe)      | Yes            | Reasonable possibility    | Drug permanently withdrawn | study Medication stopped for this patient | Yes                                  | No                                            | Recovered/ Resolved         |
| 057-009    | 3      | Back pain                     | 07/03/2018          | 09/03/2018        | .          | Grade 1 (mild)        | No             | No reasonable possibility | Dose not changed           |                                           | No                                   | No                                            | Recovered/ Resolved         |
| 057-011    | 1      | Troponin T increased          | 25/06/2018          |                   | Ongoing    | Grade 1 (mild)        | No             | No reasonable possibility | Dose not changed           |                                           | No                                   | No                                            | Not recovered/ Not resolved |
| 057-011    | 2      | Troponin T increased          | 26/06/2018          | 09/07/2018        | .          | Grade 3 (severe)      | Yes            | Reasonable possibility    | Drug permanently withdrawn |                                           | Yes                                  | No                                            | Recovering/ Resolving       |
| 057-011    | 3      | Blood lactic acid increased   | 04/07/2018          | 05/07/2018        | .          | Grade 2 (moderate)    | No             | No reasonable possibility | Dose not changed           |                                           | No                                   | No                                            | Recovered/ Resolved         |

## tTF-NGR Phase I Study EudraCT-No.: 2016-003042-85

## Line listing of adverse events (AEs) as reported in eCRF at 16.12.2019

| Patient ID | AE No. | MedDRA preferred term (v22.1)                                                        | Date of onset of AE | Date of end of AE | or ongoing | CTCAE Grading (v 4.0) | serious (=SAE) | Relationship to tTF-NGR   | Action taken with tTF-NGR  | Comment on action taken with tTF-NGR | AE considered as DLT by investigator | AE that caused discontinuation of whole study | Outcome                     |
|------------|--------|--------------------------------------------------------------------------------------|---------------------|-------------------|------------|-----------------------|----------------|---------------------------|----------------------------|--------------------------------------|--------------------------------------|-----------------------------------------------|-----------------------------|
| 057-011    | 4      | N-terminal prohormone brain natriuretic peptide increased                            | 04/07/2018          | 04/07/2018        | .          | Grade 2 (moderate)    | No             | Reasonable possibility    | Drug permanently withdrawn |                                      | No                                   | No                                            | Recovered/ Resolved         |
| 057-012    | 1      | Anaemia                                                                              | 10/07/2018          | 10/07/2018        | .          | Grade 3 (severe)      | No             | No reasonable possibility | Dose not changed           |                                      | No                                   | No                                            | Recovered/ Resolved         |
| 057-012    | 2      | Pyrexia                                                                              | 09/07/2018          | 11/07/2018        | .          | Grade 1 (mild)        | No             | No reasonable possibility | Dose not changed           |                                      | No                                   | No                                            | Recovered/ Resolved         |
| 057-012    | 3      | Abdominal pain upper; Tumour pain                                                    | 15/07/2018          | 19/07/2018        | .          | Grade 2 (moderate)    | Yes            | No reasonable possibility | Not applicable             |                                      | No                                   | No                                            | Not recovered/ Not resolved |
| 057-012    | 4      | Pyrexia                                                                              | 15/07/2018          | 17/07/2018        | .          | Grade 2 (moderate)    | Yes            | No reasonable possibility | Not applicable             |                                      | No                                   | No                                            | Recovered/ Resolved         |
| 057-012    | 5      | Nausea                                                                               | 16/07/2018          | 16/07/2018        | .          | Grade 1 (mild)        | No             | No reasonable possibility | Not applicable             |                                      | No                                   | No                                            | Recovered/ Resolved         |
| 057-012    | 6      | Vomiting                                                                             | 16/07/2018          | 16/07/2018        | .          | Grade 1 (mild)        | No             | No reasonable possibility | Not applicable             |                                      | No                                   | No                                            | Recovered/ Resolved         |
| 057-012    | 7      | Chest pain                                                                           | 16/07/2018          | 25/07/2018        | .          | Grade 2 (moderate)    | No             | No reasonable possibility | Not applicable             |                                      | No                                   | No                                            | Unknown                     |
| 057-015    | 1      | Pyrexia                                                                              | 09/10/2018          | 09/10/2018        | .          | Grade 1 (mild)        | No             | No reasonable possibility | Dose not changed           |                                      | No                                   | No                                            | Recovered/ Resolved         |
| 057-015    | 2      | Hypotension                                                                          | 10/10/2018          | 11/10/2018        | .          | Grade 1 (mild)        | No             | No reasonable possibility | Dose not changed           |                                      | No                                   | No                                            | Recovered/ Resolved         |
| 057-015    | 3      | Diarrhoea                                                                            | 18/10/2018          | 02/11/2018        | .          | Grade 1 (mild)        | No             | No reasonable possibility | Dose not changed           |                                      | No                                   | No                                            | Recovered/ Resolved         |
| 057-015    | 4      | Back pain                                                                            | 18/10/2018          | 18/10/2018        | .          | Grade 1 (mild)        | No             | No reasonable possibility | Dose not changed           |                                      | No                                   | No                                            | Recovered/ Resolved         |
| 057-015    | 5      | Jugular vein thrombosis; Brachiocephalic vein thrombosis; Subclavian vein thrombosis | 30/10/2018          | 08/11/2018        | .          | Grade 2 (moderate)    | Yes            | Reasonable possibility    | Drug permanently withdrawn |                                      | No                                   | No                                            | Recovered/ Resolved         |
| 057-015    | 6      | Lipase increased                                                                     | 08/10/2018          | 08/10/2018        | .          | Grade 3 (severe)      | No             | No reasonable possibility | Dose not changed           |                                      | No                                   | No                                            | Recovered/ Resolved         |

tTF-NGR Phase I Study EudraCT-No.: 2016-003042-85  
Line listing of adverse events (AEs) as reported in eCRF at 16.12.2019

| Patient ID | AE No. | MedDRA preferred term (v22.1)      | Date of onset of AE | Date of end of AE | or ongoing | CTCAE Grading (v 4.0) | serious (=SAE) | Relationship to tTF-NGR   | Action taken with tTF-NGR  | Comment on action taken with tTF-NGR | AE considered as DLT by investigator | AE that caused discontinuation of whole study | Outcome                     |
|------------|--------|------------------------------------|---------------------|-------------------|------------|-----------------------|----------------|---------------------------|----------------------------|--------------------------------------|--------------------------------------|-----------------------------------------------|-----------------------------|
| 057-015    | 7      | Lipase increased                   | 16/10/2018          | 16/10/2018        | .          | Grade 1 (mild)        | No             | No reasonable possibility | Dose not changed           |                                      | No                                   | No                                            | Recovered/ Resolved         |
| 057-015    | 8      | Amylase increased                  | 08/10/2018          | 08/10/2018        | .          | Grade 1 (mild)        | No             | No reasonable possibility | Dose not changed           |                                      | No                                   | No                                            | Recovered/ Resolved         |
| 057-015    | 9      | Blood creatinine increased         | 29/10/2018          | 30/10/2018        | .          | Grade 2 (moderate)    | No             | No reasonable possibility | Dose not changed           |                                      | No                                   | No                                            | Recovered/ Resolved         |
| 057-015    | 10     | Blood creatinine increased         | 08/11/2018          | 08/11/2018        | .          | Grade 2 (moderate)    | No             | No reasonable possibility | Not applicable             |                                      | No                                   | No                                            | Recovered/ Resolved         |
| 057-015    | 11     | Fibrin D dimer increased           | 30/10/2018          | 30/10/2018        | .          | Grade 2 (moderate)    | No             | Reasonable possibility    | Dose not changed           |                                      | No                                   | No                                            | Recovered/ Resolved         |
| 057-015    | 12     | Anaemia                            | 30/10/2018          | 30/10/2018        | .          | Grade 1 (mild)        | No             | No reasonable possibility | Dose not changed           |                                      | No                                   | No                                            | Recovered/ Resolved         |
| 057-015    | 13     | Hyperuricaemia                     | 08/11/2018          | 08/11/2018        | .          | Grade 1 (mild)        | No             | No reasonable possibility | Not applicable             |                                      | No                                   | No                                            | Recovered/ Resolved         |
| 057-015    | 14     | Hypercalcaemia                     | 08/11/2018          | 08/11/2018        | .          | Grade 1 (mild)        | No             | No reasonable possibility | Not applicable             |                                      | No                                   | No                                            | Recovered/ Resolved         |
| 057-016    | 1      | Abscess; Sepsis                    | 12/11/2018          | 14/11/2018        | .          | Grade 5 (death)       | Yes            | No reasonable possibility | Not applicable             | not given at all                     | No                                   | No                                            | Fatal                       |
| 057-018    | 1      | Troponin T increased               | 29/01/2019          | 31/01/2019        | .          | Grade 1 (mild)        | No             | Reasonable possibility    | Dose not changed           |                                      | No                                   | No                                            | Not recovered/ Not resolved |
| 057-018    | 2      | Troponin T increased               | 31/01/2019          | 06/02/2019        | .          | Grade 3 (severe)      | Yes            | Reasonable possibility    | Drug permanently withdrawn |                                      | Yes                                  | No                                            | Recovered/ Resolved         |
| 057-018    | 3      | Lower gastrointestinal haemorrhage | 03/02/2019          | 06/02/2019        | .          | Grade 2 (moderate)    | Yes            | No reasonable possibility | Not applicable             |                                      | No                                   | No                                            | Recovered/ Resolved         |
| 057-019    | 1      | Pyrexia                            | 14/02/2019          | 14/02/2019        | .          | Grade 1 (mild)        | No             | No reasonable possibility | Dose not changed           |                                      | No                                   | No                                            | Recovered/ Resolved         |
| 057-019    | 2      | Transient ischaemic attack         | 04/03/2019          | 05/03/2019        | .          | Grade 2 (moderate)    | Yes            | Reasonable possibility    | Drug permanently withdrawn |                                      | No                                   | No                                            | Recovered/ Resolved         |

## tTF-NGR Phase I Study EudraCT-No.: 2016-003042-85

Page 8 of 8

## Line listing of adverse events (AEs) as reported in eCRF at 16.12.2019

| Patient ID | AE No. | MedDRA preferred term (v22.1) | Date of onset of AE | Date of end of AE | or ongoing | CTCAE Grading (v 4.0) | serious (=SAE) | Relationship to tTF-NGR   | Action taken with tTF-NGR  | Comment on action taken with tTF-NGR | AE considered as DLT by investigator | AE that caused discontinuation of whole study | Outcome               |
|------------|--------|-------------------------------|---------------------|-------------------|------------|-----------------------|----------------|---------------------------|----------------------------|--------------------------------------|--------------------------------------|-----------------------------------------------|-----------------------|
| 057-019    | 3      | Troponin T increased          | 15/02/2019          | 18/02/2019        | .          | Grade 1 (mild)        | No             | Reasonable possibility    | Dose not changed           |                                      | No                                   | No                                            | Recovered/ Resolved   |
| 057-020    | 1      | Diarrhoea                     | 07/04/2019          | 08/04/2019        | .          | Grade 1 (mild)        | No             | No reasonable possibility | Dose not changed           |                                      | No                                   | No                                            | Recovered/ Resolved   |
| 057-020    | 2      | Pyrexia                       | 11/04/2019          | 13/04/2019        | .          | Grade 2 (moderate)    | No             | No reasonable possibility | Dose not changed           |                                      | No                                   | No                                            | Recovered/ Resolved   |
| 057-020    | 3      | Device related infection      | 14/04/2019          | 30/04/2019        | .          | Grade 3 (severe)      | Yes            | No reasonable possibility | Dose not changed           |                                      | No                                   | No                                            | Recovered/ Resolved   |
| 057-021    | 1      | Troponin T increased          | 16/04/2019          | 25/04/2019        | .          | Grade 3 (severe)      | Yes            | Reasonable possibility    | Drug permanently withdrawn |                                      | Yes                                  | No                                            | Recovered/ Resolved   |
| 057-022    | 1      | Head discomfort               | 03/06/2019          | 04/06/2019        | .          | Grade 1 (mild)        | No             | No reasonable possibility | Dose not changed           |                                      | No                                   | No                                            | Recovered/ Resolved   |
| 057-022    | 2      | Hyperhidrosis                 | 08/06/2019          | 10/06/2019        | .          | Grade 2 (moderate)    | No             | No reasonable possibility | Dose not changed           |                                      | No                                   | No                                            | Recovered/ Resolved   |
| 057-022    | 3      | Thrombocytopenia              | 28/06/2019          | 28/06/2019        | .          | Grade 1 (mild)        | No             | Reasonable possibility    | Dose not changed           |                                      | No                                   | No                                            | Recovered/ Resolved   |
| 057-023    | 1      | Thrombocytopenia              | 08/07/2019          | 17/07/2019        | .          | Grade 2 (moderate)    | No             | Reasonable possibility    | Dose not changed           |                                      | No                                   | No                                            | Recovered/ Resolved   |
| 057-024    | 1      | Ataxia                        | 31/10/2019          | 06/11/2019        | .          | Grade 3 (severe)      | Yes            | No reasonable possibility | Not applicable             |                                      | No                                   | No                                            | Recovering/ Resolving |

Troponin T in Table S1 stands for Troponin T hs, which was actually measured.

Table S2. Absolute doses of tTF-NGR given per patients.

| Suppl. Table 2: Absolute doses of tTF-NGR given per patient                                     |             |        |                   |                             |                                         |                                        |       |       |       |       |          |       |       |       |       |       |       |       |       |       |  |  |  |  |  |  |  |  |
|-------------------------------------------------------------------------------------------------|-------------|--------|-------------------|-----------------------------|-----------------------------------------|----------------------------------------|-------|-------|-------|-------|----------|-------|-------|-------|-------|-------|-------|-------|-------|-------|--|--|--|--|--|--|--|--|
|                                                                                                 |             |        |                   |                             |                                         | Absolute Dose [mg] per Day per Patient |       |       |       |       |          |       |       |       |       |       |       |       |       |       |  |  |  |  |  |  |  |  |
| UPN                                                                                             | Birthday    | Gender | tTF-NGR batch no. | Dose [mg/m <sup>2</sup> ]   | Body Surface Area (BSA,m <sup>2</sup> ) | C1 d1                                  | C1 d2 | C1 d3 | C1 d4 | C1 d5 | C2 d1    | C2 d2 | C2 d3 | C2 d4 | C2 d5 | C3 d1 | C3 d2 | C3 d3 | C3 d4 | C3 d5 |  |  |  |  |  |  |  |  |
| 057-001                                                                                         | 23.06.1968* | m      | —                 | —**                         | —                                       | —***                                   | —     | —     | —     | —     | —        | —     | —     | —     | —     | —     | —     | —     | —     | —     |  |  |  |  |  |  |  |  |
| 057-002                                                                                         | 16.12.79    | m      | —                 | —                           | —                                       | —                                      | —     | —     | —     | —     | —        | —     | —     | —     | —     | —     | —     | —     | —     | —     |  |  |  |  |  |  |  |  |
| 057-003                                                                                         | 10.08.96    | m      | 29, 30            | C1: 1.0 / C2: 1.5           | C1: 1.94 / C2: 1.94                     | 1.94                                   | 1.94  | 1.94  | 1.94  | 1.94  | 2.91**** | 2.91  | 2.91  | 2.91  | 2.91  | —     | —     | —     | —     | —     |  |  |  |  |  |  |  |  |
| 057-004                                                                                         | 30.05.90    | f      | 29, 30            | C1: 1.5 / C2: 2.0           | C1: 1.6 / C2: 1.59***                   | 2.40                                   | 2.40  | 2.40  | 2.40  | 2.40  | 3.20     | 3.20  | 3.20  | 3.20  | 3.20  | —     | —     | —     | —     | —     |  |  |  |  |  |  |  |  |
| 057-005                                                                                         | 07.02.54    | m      | 29, 30            | C1: 2.0 / C2: 2.5           | C1: 2.1 / C2: 2.1                       | 4.20                                   | 4.20  | 4.20  | 4.20  | 4.20  | 5.25     | 5.25  | 5.25  | 5.25  | 5.25  | —     | —     | —     | —     | —     |  |  |  |  |  |  |  |  |
| 057-006                                                                                         | 05.12.72    | m      | 31, 33, 34        | C1: 2.5 / C2: 3.0           | C1: 2.2 / C2: 2.2                       | 5.50                                   | 5.50  | 5.50  | 5.50  | 5.50  | 6.60     | 6.60  | 6.60  | 6.60  | 6.60  | —     | —     | —     | —     | —     |  |  |  |  |  |  |  |  |
| 057-007                                                                                         | 19.02.60    | m      | 29, 31, 34        | C1: 3.0 / C2: 4.0 / C3: 5.0 | C1: 2.0 / C2: 2.0 / C3: 2.0             | 6.00                                   | 6.00  | 6.00  | 6.00  | 6.00  | 8.00     | 8.00  | 8.00  | 8.00  | 8.00  | 10.00 | 10.00 | 10.00 | 10.00 | 10.00 |  |  |  |  |  |  |  |  |
| 057-008                                                                                         | 25.12.72    | m      | 29, 31            | C1: 5.0 / C2: -             | C1: 1.9 / C2: -                         | 9.50                                   | 9.50  | 9.50  | —     | —     | —        | —     | —     | —     | —     | —     | —     | —     | —     | —     |  |  |  |  |  |  |  |  |
| 057-009                                                                                         | 19.11.62    | m      | 31                | C1: 5.0 / C2: -             | C1: 1.9 / C2: -                         | 9.50                                   | —     | —     | —     | —     | —        | —     | —     | —     | —     | —     | —     | —     | —     | —     |  |  |  |  |  |  |  |  |
| 057-010                                                                                         | 18.05.60    | f      | —                 | —                           | —                                       | —                                      | —     | —     | —     | —     | —        | —     | —     | —     | —     | —     | —     | —     | —     | —     |  |  |  |  |  |  |  |  |
| 057-011                                                                                         | 17.01.44    | m      | 33                | C1: 4.0 / C2: -             | C1: 1.8 / C2: -                         | 7.20                                   | 7.20  | —     | —     | —     | —        | —     | —     | —     | —     | —     | —     | —     | —     | —     |  |  |  |  |  |  |  |  |
| 057-012                                                                                         | 29.04.93    | m      | 33                | C1: 4.0 / C2: -             | C1: 2.0 / C2: -                         | 8.00                                   | 8.00  | 8.00  | 8.00  | 8.00  | —        | —     | —     | —     | —     | —     | —     | —     | —     | —     |  |  |  |  |  |  |  |  |
| 057-013                                                                                         | 01.08.61    | m      | —                 | —                           | —                                       | —                                      | —     | —     | —     | —     | —        | —     | —     | —     | —     | —     | —     | —     | —     | —     |  |  |  |  |  |  |  |  |
| 057-014                                                                                         | 19.10.56    | m      | —                 | —                           | —                                       | —                                      | —     | —     | —     | —     | —        | —     | —     | —     | —     | —     | —     | —     | —     | —     |  |  |  |  |  |  |  |  |
| 057-015                                                                                         | 09.06.56    | m      | 34                | C1: 4.0 / C2: 4.0           | C1: 1.9 / C2: 1.89                      | 7.60                                   | 7.60  | 7.60  | 7.60  | 7.60  | 7.56     | 7.56  | 7.56  | 7.56  | 7.56  | —     | —     | —     | —     | —     |  |  |  |  |  |  |  |  |
| 057-016                                                                                         | 11.10.55    | m      | —                 | —                           | —                                       | —                                      | —     | —     | —     | —     | —        | —     | —     | —     | —     | —     | —     | —     | —     | —     |  |  |  |  |  |  |  |  |
| 057-017                                                                                         | 16.07.74    | m      | —                 | —                           | —                                       | —                                      | —     | —     | —     | —     | —        | —     | —     | —     | —     | —     | —     | —     | —     | —     |  |  |  |  |  |  |  |  |
| 057-018                                                                                         | 17.06.64    | f      | 33                | C1: 4.0 / C2: -             | C1: 1.84 / C2: -                        | 7.40                                   | 7.40  | 7.40  | —     | —     | —        | —     | —     | —     | —     | —     | —     | —     | —     | —     |  |  |  |  |  |  |  |  |
| 057-019                                                                                         | 09.12.77    | f      | 33, 34            | C1: 3.0 / C2: 3.0           | C1: 1.7 / C2: 1.7                       | 5.10                                   | 5.10  | 5.10  | 5.10  | 5.10  | 5.10     | —     | —     | —     | —     | —     | —     | —     | —     | —     |  |  |  |  |  |  |  |  |
| 057-020                                                                                         | 04.12.99    | m      | 33, 34            | C1: 3.0 / C2: 3.0           | C1: 1.7 / C2: 1.7                       | 5.10                                   | 5.10  | 5.10  | 5.10  | 5.10  | 5.10     | 5.10  | 5.10  | 5.10  | 5.10  | —     | —     | —     | —     | —     |  |  |  |  |  |  |  |  |
| 057-021                                                                                         | 19.06.55    | m      | 34                | C1: 3.0 / C2: -             | C1: 1.83 / C2: -                        | 5.50                                   | —     | —     | —     | —     | —        | —     | —     | —     | —     | —     | —     | —     | —     | —     |  |  |  |  |  |  |  |  |
| 057-022                                                                                         | 14.11.62    | f      | 36, 37            | C1: 3.0 / C2: 3.0           | C1: 1.76 / C2: 1.76/1.79                | 5.28                                   | 5.28  | 5.28  | 5.28  | 5.28  | 5.28     | 5.28  | 5.37  | 5.37  | 5.28  | —     | —     | —     | —     | —     |  |  |  |  |  |  |  |  |
| 057-023                                                                                         | 02.01.59    | m      | 36, 37            | C1: 3.0 / C2: 3.0           | C1: 1.74 / C2: 1.74/1.76                | 5.22                                   | 5.22  | 5.22  | 5.22  | 5.22  | 5.22     | 5.22  | 5.28  | 5.28  | 5.28  | —     | —     | —     | —     | —     |  |  |  |  |  |  |  |  |
| 057-024                                                                                         | 07.06.95    | m      | 38, 39            | C1: 3.0 / C2: 3.0           | C1: 1.79 / C2: 1.80                     | 5.37                                   | 5.37  | 5.37  | 5.37  | 5.37  | 5.40     | 5.40  | 5.40  | 5.40  | 5.40  | —     | —     | —     | —     | —     |  |  |  |  |  |  |  |  |
| *, day.month.year; **, screening failure; ***, not given; ****, changes according to actual BSA |             |        |                   |                             |                                         |                                        |       |       |       |       |          |       |       |       |       |       |       |       |       |       |  |  |  |  |  |  |  |  |
| UPN, unique patient number, here with study number 057; C, cycle; d, day; f, female; m, male    |             |        |                   |                             |                                         |                                        |       |       |       |       |          |       |       |       |       |       |       |       |       |       |  |  |  |  |  |  |  |  |

**Table S3.** Frequency of SUSAR and SAE possibly related to tTF-NGR (MedDRA v22.1).

| Observation    | MeDRA preferred term              | n <sup>1</sup> | Maximum dose level tTF-NGR <sup>1</sup> | UPN      | Maximum CTCAE 4.0 grade |
|----------------|-----------------------------------|----------------|-----------------------------------------|----------|-------------------------|
| 1              | Transient ischaemic attack        | 1              | 3                                       | 019      | 2, moderate             |
| 2              | Troponin T <sup>3</sup> increased | 1              | 3                                       | 021      | 3, severe               |
| 3 <sup>4</sup> | Brachiocephalic vein thrombosis   | 1              | 4                                       | 015      | 2, moderate             |
| 4 <sup>4</sup> | Jugular vein thrombosis           | 1              | 4                                       | 015      | 2, moderate             |
| 5 <sup>4</sup> | Subclavian vein thrombosis        | 1              | 4                                       | 015      | 2, moderate             |
| 6              | Troponin T increased              | 2              | 4                                       | 011, 018 | 3, severe               |
| 7              | Deep vein thrombosis              | 1              | 5                                       | 008      | 2, moderate             |
| 8              | Troponin T increased              | 2              | 5                                       | 008, 009 | 3, severe               |

<sup>1</sup>, number of patients with this observation;

<sup>2</sup>, dose level in mg/m<sup>2</sup> tTF-NGR/day × 5;

<sup>3</sup>, Troponin T relates to Troponin T hs, a term actually not present in CTCAE 4.0, further comments see results and discussion;

<sup>4</sup>, observation 3, 4, and 5 relate to the identical patient UPN 015, who developed a catheter-related thrombosis partially involving all 3 veins (see results in the manuscript).

**Table S4.** tTF-NGR phase I study - CEUS maximum and minimum A.U. values for wash-in perfusion index in all patients with measurable lesions.

| UPN - diagnosis                 | Measurement wash-in perfusion index (PI) | region of interest                      | tTF-NGR dose in mg/m <sup>2</sup> x 5 | prior to tTF-NGR cycle 1                                                | post/during tTF-NGR cycle 1     | between cycles 1 and 2     | prior to tTF-NGR cycle 2 | post tTF-NGR cycle 2             |
|---------------------------------|------------------------------------------|-----------------------------------------|---------------------------------------|-------------------------------------------------------------------------|---------------------------------|----------------------------|--------------------------|----------------------------------|
| 003 - germ cell cancer          | wash-in PI                               | liver metastasis                        | 1.5                                   | 506.9                                                                   | 52.9                            |                            |                          |                                  |
|                                 | wash-in PI                               | liver reference                         | 1.5                                   | 117.4                                                                   | 86.7                            |                            |                          |                                  |
| 004 - hepatocellular carcinoma  | wash-in PI                               | metastasis intra- and extra-hepatically | cycle 1: 1.5<br>cycle 2: 2.0          | ROI 1: 283.6<br>ROI 2: 522.4                                            | 249.7<br>515.5                  | 126.9<br>338.4             | 254.1<br>679.7           | 124.3<br>386.0                   |
|                                 | wash-in PI                               | liver reference                         | cycle 1: 1.5<br>cycle 2: 2.0          | 54.9                                                                    | 80.3                            | 82.5                       | 96.1                     | 75.9                             |
| 006 - colorectal carcinoma      | wash-in PI                               | liver metastasis ROI 2 in ROI 1         | 2.5                                   | ROI 1: 102.7<br>ROI 2: 65.2                                             | 9.3<br>3.0                      |                            |                          |                                  |
|                                 | wash-in PI                               | liver reference                         | 2.5                                   | 47.8                                                                    | 65.8                            |                            |                          |                                  |
| 011 - colorectal carcinoma      | wash-in PI                               | liver metastasis                        | 4.0, appl. only days 1 and 2          | lesion 1: 1517.5<br>total lesion: 541.0                                 | 1465.9<br>773.6                 |                            |                          |                                  |
|                                 | wash-in PI                               | liver reference                         | 4.0, appl. only days 1 and 2          | 62.3                                                                    | 339.6                           |                            |                          |                                  |
|                                 | wash-in PI in % of liver reference       | liver metastasis ROI 2 in ROI 1         |                                       | lesion 1: 2446 %<br>total lesion: 872 %                                 | 423 %<br>228 %                  |                            |                          |                                  |
| 012 - germ cell cancer          | wash-in PI                               | liver metastasis                        | cycle 1: 4.0                          | total lesion: 103.9                                                     | total lesion (d3): 56.2         |                            |                          |                                  |
|                                 |                                          | liver reference                         | cycle 1: 4.0                          | 50.8                                                                    | d3: 72.1                        |                            |                          |                                  |
| 015 – medullary thyroid cancer  | wash-in PI                               | liver metastasis neck                   | 4.0                                   | total lesion: 9.63<br>lower half: 8.17<br>small hyperperfused ROI: 7.50 | 0.86<br>1.11<br>4.94            |                            | 4.32<br>9.06<br>6.35     |                                  |
| 019 - angiosarcoma              | wash-in PI %                             | liver metastasis                        | 3.0                                   | total lesion 562.3 %<br>ref lesion: 1520.7 %                            | d1: 355.1 %<br>d1: 705.0 %      | d5: 443.5 %<br>d5: 781.1 % |                          |                                  |
|                                 | wash-in PI %                             | liver reference                         | 3.0                                   | 100 %                                                                   | 100%                            | 100 %                      |                          |                                  |
| 020 – small round cell tumor    | wash-in PI                               | liver metastasis                        | 3.0                                   | total lesion: 77.2<br>central lesion: 56.9<br>upper part: 12.6          | d1: 66.0<br>d1: 39.0<br>d1: 6.4 | 159.9<br>119.6<br>17.8     | 243.7<br>182.3<br>5.7    | 176.5<br>213.6<br>3.5 (necrosis) |
|                                 | wash-in PI                               | liver reference                         | 3.0                                   | 128.0                                                                   | d1: 110.7                       | 147.5                      | 148.9                    | 152.8                            |
| 022 – hepatocellular carcinoma  | wash-in PI                               | liver lesion                            | 3.0                                   | total lesion: 233.2<br>central lesion: 246.4                            | 61.3<br>52.7                    |                            | 181.0<br>106.5           | 83.0<br>51.4                     |
|                                 | wash-in PI                               | liver reference                         | 3.0                                   | not available (NA)                                                      | NA                              |                            | NA                       | NA                               |
| 023 – colorectal adenocarcinoma | wash-in PI                               | liver metastasis                        | 3.0                                   | total lesion: 64.8<br>central lesion: 43.2                              | 26.7<br>5.7                     |                            | 31.1<br>30.6             | d1: 11.2<br>d1: 7.7              |
|                                 |                                          | Liver reference                         | 3.0                                   | NA                                                                      | NA                              |                            | NA                       | NA                               |

CEUS, contrast enhanced ultrasound; A.U., arbitrary units; d=day; Inn, lymph nodes

Wash-in Perfusion Index (PI): Wash-in Area Under the Curve/Rise Time (see Suppl. Figure 1);

Patients 001, 002, 010, 011, 013, 014, 016, 017 were screening failures and/or not treated, patients 005, 007, 008, 009, and 024 had no lesions measurable by CEUS, patients 008 and 018 had a DLT,

Pat 019: variable blood flow, thus a.u. given also as percentage of normal liver reference lesion, NA, not available



**Table S6.** CD13 immunohistochemistry (IHC) staining intensity per patient and distribution according to histology.

| Staining Location |                                      | Vascular/Perivascular | Tumor Cells | Composite Stain* |
|-------------------|--------------------------------------|-----------------------|-------------|------------------|
| Patient UPN**     | Diagnosis**                          | ***                   |             |                  |
| 003               | germ cell                            | n.d.                  | n.d.        | n.d.             |
| 004               | HCC                                  | 1                     | 2           | 2                |
| 005               | SCLC                                 | 1                     | 0           | 1                |
| 006               | rectal adeno                         | 2                     | 0           | 2                |
| 007               | colon adeno                          | 1                     | 0           | 1                |
| 008               | synovial sarcoma                     | 2                     | 0           | 2                |
| 009               | squamous lung                        | 2                     | 0           | 2                |
| 011               | colon adeno                          | 1                     | 0           | 1                |
| 012               | germ cell                            | 3                     | 1           | 3                |
| 015               | medullary thyroid                    | 1                     | 0           | 1                |
| 018               | CUP                                  | 2                     | 0           | 2                |
| 019               | angiosarcoma                         | 2                     | 1           | 2                |
| 020               | desmoplastic round cell              | n.d.                  | n.d.        | n.d.             |
| 021               | synovial sarcoma                     | 3                     | 3           | 3                |
| 022               | HCC                                  | n.d.                  | n.d.        | n.d.             |
| 023               | colon adeno                          | n.d.                  |             |                  |
| 024               | undifferentiated pleomorphic sarcoma | 2                     | 3           | 3                |

\*, composite indicates the highest observed intensity of either vascular/perivascular or tumor cell per case;

\*\*, for histology and disease history see Table 1;

\*\*\*, intensity scores according to the method published (see ref. 20);

n.d., not done; HCC, hepatocellular carcinoma; SCLC, small-cell lung cancer;

CUP, cancer of unknown primary

**Table S7.** Non-compartment analysis of tTF-NGR with various intravenous doses of tTF-NGR administered to cancer patients. (For Tables S7 A–C: For explanation and description of values and methodology see Methods. UPN, unique patient number; c, cycle; h, hour; term., terminal)

**Table S7. A.** Non-compartment analysis of tTF-NGR with various intravenous doses of tTF-NGR administered to cancer patients (all data; some data reappear in verification groups).

| Non-compartment analysis of tTF-NGR, test day 1 (all values up to 24 hours after start of 1st infusion) |                        |                                          |                                      |                                    |                          |                                      |                                                                            |                                                               |
|---------------------------------------------------------------------------------------------------------|------------------------|------------------------------------------|--------------------------------------|------------------------------------|--------------------------|--------------------------------------|----------------------------------------------------------------------------|---------------------------------------------------------------|
| Dose<br>[mg/m <sup>2</sup> ]                                                                            | Pat.-<br>UPN<br>/cycle | C <sub>max</sub> <sup>#</sup><br>[ng/mL] | t <sub>max</sub> <sup>#</sup><br>[h] | t <sub>1/2</sub><br>(term.)<br>[h] | K <sub>el</sub><br>[1/h] | AUC <sub>0-t last</sub><br>[ng*h/mL] | time interval<br>for t <sub>1/2</sub><br>determination<br>[h] <sup>†</sup> | AUC <sub>0-t last</sub> /dose<br>[h*m <sup>2</sup> *ng/mL/mg] |
| 1.0                                                                                                     | 003/c1                 | 138.10                                   | 1.0                                  | 7.34                               | 0.094                    | 285.54                               | 3.5–24.0                                                                   | 285.54                                                        |
|                                                                                                         | 003/c2                 | 227.45                                   | 1.0                                  | 6.02                               | 0.115                    | 513.00                               | 3.5–24.0                                                                   | 342.00                                                        |
| 1.5                                                                                                     | 004/c1                 | 295.95                                   | 1.0                                  | 5.62                               | 0.123                    | 556.37                               | 3.0–24.0                                                                   | 370.91                                                        |
|                                                                                                         | mean                   | 261.70                                   | 1.0                                  | 5.82                               | 0.119                    | 534.69                               | –                                                                          | 356.46                                                        |
|                                                                                                         | 004/c2                 | 354.28                                   | 1.0                                  | 4.86                               | 0.143                    | 682.47                               | 3.5–24.0                                                                   | 341.24                                                        |
| 2.0                                                                                                     | 005/c1                 | 328.31                                   | 1.0                                  | 5.15                               | 0.135                    | 1132.14                              | 3.5–24.0                                                                   | 566.07                                                        |
|                                                                                                         | mean                   | 341.30                                   | 1.0                                  | 7.4                                | 0.139                    | 907.31                               | –                                                                          | 453.66                                                        |
|                                                                                                         | 005/c2                 | 412.64                                   | 1.0                                  | 8.07                               | 0.086                    | 1492.83                              | 3.5–24.0                                                                   | 597.13                                                        |
| 2.5                                                                                                     | 006/c1                 | 459.46                                   | 1.0                                  | 7.03                               | 0.099                    | 1597.85                              | 3.5–24.0                                                                   | 1031.12                                                       |
|                                                                                                         | mean                   | 436.05                                   | 1.0                                  | 7.55                               | 0.093                    | 1545.34                              | –                                                                          | 618.14                                                        |
|                                                                                                         | 006/c2                 | 534.33                                   | 1.0                                  | 9.73                               | 0.071                    | 2608.60                              | 3.5–24.0                                                                   | 869.53                                                        |
|                                                                                                         | 007/c1                 | 613.45                                   | 1.0                                  | 6.84                               | 0.101                    | 2404.00                              | 3.5–24.0                                                                   | 801.33                                                        |
|                                                                                                         | 019/c1                 | 930.96                                   | 1.0                                  | 9.59                               | 0.072                    | 2942.32                              | 3.0–24.0                                                                   | 980.77                                                        |
|                                                                                                         | 019/c2                 | 1312.39                                  | 1.0                                  | 11.07                              | 0.063                    | 2980.56                              | 3.5–24.0                                                                   | 993.52                                                        |
|                                                                                                         | 020/c1                 | 730.09                                   | 1.0                                  | 8.38                               | 0.083                    | 2205.38                              | 3.5–24.0                                                                   | 735.13                                                        |
|                                                                                                         | 020/c2                 | 528.64                                   | 1.0                                  | 10.04                              | 0.069                    | 1914.98                              | 3.0–24.0                                                                   | 638.33                                                        |
| 3.0                                                                                                     | 021/c1                 | 694.56                                   | 1.0                                  | 9.49                               | 0.073                    | 3197.90                              | 3.5–24.0                                                                   | 1065.97                                                       |
|                                                                                                         | 022/c1                 | 549.72                                   | 1.0                                  | 7.51                               | 0.092                    | 1940.19                              | 3.5–24.0                                                                   | 646.73                                                        |
|                                                                                                         | 022/c2                 | 717.03                                   | 1.0                                  | 11.09                              | 0.063                    | 2926.03                              | 3.0–24.0                                                                   | 975.34                                                        |
|                                                                                                         | 023/c1                 | 647.0                                    | 1.0                                  | 7.31                               | 0.095                    | 1802.17                              | 3.5–24.0                                                                   | 600.72                                                        |
|                                                                                                         | 023/c2                 | 577.29                                   | 1.0                                  | 11.11                              | 0.062                    | 2038.59                              | 3.0–24.0                                                                   | 679.53                                                        |
|                                                                                                         | 024/c1                 | 523.96                                   | 1.0                                  | 7.47                               | 0.093                    | 1977.68                              | 3.0–24.0                                                                   | 659.23                                                        |
|                                                                                                         | 024/c2                 | 548.69                                   | 1.0                                  | 7.29                               | 0.095                    | 1822.53                              | 3.0–24.0                                                                   | 607.51                                                        |
|                                                                                                         | mean                   | 685.24                                   | 1.0                                  | 8.99                               | 0.079                    | 2366.23                              | –                                                                          | 788.74                                                        |
|                                                                                                         | 007/c2                 | 1129.27                                  | 1.5                                  | 8.73                               | 0.079                    | 3311.11                              | 3.5–24.0                                                                   | 827.78                                                        |
|                                                                                                         | 011/c1                 | 1085.72                                  | 1.0                                  | 7.90                               | 0.088                    | 4446.09                              | 3.5–24.0                                                                   | 1111.52                                                       |
|                                                                                                         | 012/c1                 | 1242.88                                  | 1.0                                  | 8.57                               | 0.081                    | 3512.46                              | 5.5–24.0                                                                   | 878.12                                                        |
| 4.0                                                                                                     | 015/c1                 | 1763.35                                  | 1.0                                  | 6.10                               | 0.110                    | 6628.61                              | 3.0–24.0                                                                   | 1657.15                                                       |
|                                                                                                         | 015/c2                 | 1672.61                                  | 1.0                                  | 7.63                               | 0.091                    | 8368.98                              | 3.5–24.0                                                                   | 2092.25                                                       |
|                                                                                                         | 018/c1                 | 840.79                                   | 1.0                                  | 7.85                               | 0.088                    | 2657.41                              | 3.5–24.0                                                                   | 664.35                                                        |
|                                                                                                         | mean                   | 1289.10                                  | 1.08                                 | 7.80                               | 0.090                    | 4820.78                              | –                                                                          | 1205.20                                                       |
|                                                                                                         | 007/c3                 | 1089.79                                  | 1.0                                  | 6.08                               | 0.114                    | 5082.18                              | 3.5–24.0                                                                   | 1016.44                                                       |
| 5.0                                                                                                     | 008/c1                 | 1770.21                                  | 1.5                                  | 5.27                               | 0.132                    | 5089.87                              | 3.5–24.0                                                                   | 1017.97                                                       |
|                                                                                                         | 009/c1                 | 1001.43                                  | 1.0                                  | 7.13                               | 0.097                    | 4107.33                              | 3.5–24.0                                                                   | 821.47                                                        |
|                                                                                                         | mean                   | 1287.14                                  | 1.17                                 | 6.16                               | 0.114                    | 4759.79                              | –                                                                          | 951.96                                                        |

<sup>#</sup>, values obtained from plasma analysis, all other values calculated by toxicokinetic analysis

**Table S7. B.** Non-compartment analysis of tTF-NGR with intravenous doses of 4.0 mg/m<sup>2</sup>. (4.0 mg/m<sup>2</sup>-verification group; values are also in Table S7. A).

| Non-compartment analysis of tTF-NGR, test day 1 (up to 24 h after start of 1st infusion of each cycle) |                    |                                          |                                      |                                    |                          |                                      |                                                                                 |                                                               |
|--------------------------------------------------------------------------------------------------------|--------------------|------------------------------------------|--------------------------------------|------------------------------------|--------------------------|--------------------------------------|---------------------------------------------------------------------------------|---------------------------------------------------------------|
| Dose<br>[mg/m <sup>2</sup> ]                                                                           | Pat.-<br>UPN/cycle | C <sub>max</sub> <sup>#</sup><br>[ng/mL] | t <sub>max</sub> <sup>#</sup><br>[h] | t <sub>1/2</sub><br>(term.)<br>[h] | K <sub>el</sub><br>[1/h] | AUC <sub>0-t last</sub><br>[ng*h/mL] | time<br>interval<br>for t <sub>1/2</sub><br>determina-<br>tion [h] <sup>#</sup> | AUC <sub>0-t last</sub> /dose<br>[h*m <sup>2</sup> *ng/mL/mg] |
| 4.0                                                                                                    | 007/c2             | 1129.27                                  | 1.5                                  | 8.73                               | 0.079                    | 3311.11                              | 3.5–24.0                                                                        | 827.78                                                        |
|                                                                                                        | 011/c1             | 1085.72                                  | 1.0                                  | 7.90                               | 0.088                    | 4446.09                              | 3.5–24.0                                                                        | 1111.52                                                       |
|                                                                                                        | 012/c1             | 1242.88                                  | 1.0                                  | 8.57                               | 0.081                    | 3512.46                              | 5.5–24.0                                                                        | 878.12                                                        |
|                                                                                                        | 015/c1             | 1763.35                                  | 1.0                                  | 6.10                               | 0.110                    | 6628.61                              | 4.0–24.0                                                                        | 1657.15                                                       |
|                                                                                                        | 015/c2             | 1672.61                                  | 1.0                                  | 7.63                               | 0.091                    | 8368.98                              | 3.5–24.0                                                                        | 2092.25                                                       |
|                                                                                                        | 018/c1             | 840.79                                   | 1.0                                  | 7.85                               | 0.088                    | 2657.41                              | 3.5–24.0                                                                        | 664.35                                                        |
|                                                                                                        | mean               | 1289.10                                  | 1.08                                 | 7.80                               | 0.090                    | 4820.78                              | –                                                                               | 1205.20                                                       |

<sup>#</sup>, values obtained from plasma analysis; all other values calculated by toxicokinetic analysis

**Table 7. C.** Non-compartment analysis of tTF-NGR with intravenous doses of 3.0 mg/m<sup>2</sup>. (3.0 mg/m<sup>2</sup>-verification group; values are also in Table S7. A).

| Non-compartment analysis of tTF-NGR, test day 1 (up to 24 h after start of 1st infusion of each cycle) |                    |                                          |                                      |                                 |                          |                                      |                                                                              |                                                               |
|--------------------------------------------------------------------------------------------------------|--------------------|------------------------------------------|--------------------------------------|---------------------------------|--------------------------|--------------------------------------|------------------------------------------------------------------------------|---------------------------------------------------------------|
| Dose<br>[mg/m <sup>2</sup> ]                                                                           | Pat.-<br>UPN/cycle | C <sub>max</sub> <sup>#</sup><br>[ng/mL] | t <sub>max</sub> <sup>#</sup><br>[h] | t <sub>1/2</sub> (term.)<br>[h] | K <sub>el</sub><br>[1/h] | AUC <sub>0-t last</sub><br>[ng*h/mL] | time interval<br>for t <sub>1/2</sub><br>determina-<br>tion [h] <sup>#</sup> | AUC <sub>0-t last</sub> /dose<br>[h*m <sup>2</sup> *ng/mL/mg] |
| 3.0                                                                                                    | 006/c2             | 534.33                                   | 1.0                                  | 9.73                            | 0.071                    | 2608.60                              | 3.5–24.0                                                                     | 869.53                                                        |
|                                                                                                        | 007/c1             | 613.45                                   | 1.0                                  | 6.84                            | 0.101                    | 2404.00                              | 3.5–24.0                                                                     | 801.33                                                        |
|                                                                                                        | 019/c1             | 930.96                                   | 1.0                                  | 9.59                            | 0.072                    | 2942.32                              | 3.0–24.0                                                                     | 980.77                                                        |
|                                                                                                        | 019/c2             | 1312.39                                  | 1.0                                  | 11.07                           | 0.063                    | 2980.56                              | 3.5–24.0                                                                     | 993.52                                                        |
|                                                                                                        | 020/c1             | 730.09                                   | 1.0                                  | 8.38                            | 0.083                    | 2205.38                              | 3.5–24.0                                                                     | 735.13                                                        |
|                                                                                                        | 020/c2             | 528.64                                   | 1.0                                  | 10.04                           | 0.069                    | 1914.98                              | 3.0–24.0                                                                     | 638.33                                                        |
|                                                                                                        | 021/c1             | 694.56                                   | 1.0                                  | 9.49                            | 0.073                    | 3197.90                              | 3.5–24.0                                                                     | 1065.97                                                       |
|                                                                                                        | 022/c1             | 549.72                                   | 1.0                                  | 7.51                            | 0.092                    | 1940.19                              | 3.5–24.0                                                                     | 646.73                                                        |
|                                                                                                        | 022/c2             | 717.03                                   | 1.0                                  | 11.09                           | 0.063                    | 2926.03                              | 3.0–24.0                                                                     | 975.34                                                        |
|                                                                                                        | 023/c1             | 647.0                                    | 1.0                                  | 7.31                            | 0.095                    | 1802.17                              | 3.5–24.0                                                                     | 600.72                                                        |

|  |               |               |            |             |              |                |          |               |
|--|---------------|---------------|------------|-------------|--------------|----------------|----------|---------------|
|  | <b>023/c2</b> | 577.29        | 1.0        | 11.11       | 0.062        | 2038.59        | 3.0–24.0 | 679.53        |
|  | <b>024/c1</b> | 523.96        | 1.0        | 7.47        | 0.093        | 1977.68        | 3.0–24.0 | 659.23        |
|  | <b>024/c2</b> | 548.69        | 1.0        | 7.29        | 0.095        | 1822.53        | 3.0–24.0 | 607.51        |
|  | <b>mean</b>   | <b>685.24</b> | <b>1.0</b> | <b>8.99</b> | <b>0.079</b> | <b>2366.23</b> | –        | <b>788.74</b> |

#, values obtained from plasma analysis, all other values calculated by toxicokinetic analysis.
